# Supplementary material for: Potassium silicate and vinasse enhance biometric characteristics of perennial sweet pepper (Capsicum annuum) under greenhouse conditions
Source: PubMed Central journal article supplement (PMC11099072; doi:10.1038/s41598-024-61454-z), 2024-05-16
Supplement: 41598_2024_61454_MOESM1_ESM.pdf [file 41598_2024_61454_MOESM1_ESM.pdf]

## Potassium Silicate and Vinasse Enhance Biometric Characteristics of Perennial Sweet Pepper (*Capsicum annuum*) under Greenhouse Conditions

Mahmoud S. Rady, Ibrahim M. Ghoneim, Mostafa N. Feleafeh, and Shimaa M. Hassan

Shapiro-Wilk test for normality

| Season    | Variable            | Alpha Value | p-value | Statistic value | H <sub>0</sub> Hypothesis     | Data distribution |                                                                                      |
|-----------|---------------------|-------------|---------|-----------------|-------------------------------|-------------------|--------------------------------------------------------------------------------------|
| 2018/2019 | Plant fresh biomass | 0.05        | 0.260   | 0.963           | Fail to reject H <sub>0</sub> | Normal            | 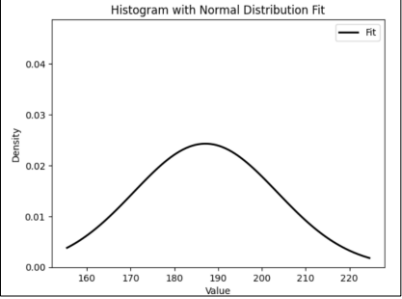  |
|           | Plant dry biomass   | 0.05        | 0.211   | 0.960           | Fail to reject H <sub>0</sub> | Normal            |  |

|  |                           |      |       |       |                      |        |  |
|--|---------------------------|------|-------|-------|----------------------|--------|--|
|  | Total leaf area per plant | 0.05 | 0.268 | 0.963 | Fail to reject $H_0$ | Normal |  |
|  | Fruit weight              | 0.05 | 0.133 | 0.953 | Fail to reject $H_0$ | Normal |  |
|  | Total yield per $m^2$     | 0.05 | 0.216 | 0.960 | Fail to reject $H_0$ | Normal |  |
|  | Chlorophyll index         | 0.05 | 0.559 | 0.974 | Fail to reject $H_0$ | Normal |  |

|  |                       |      |       |       |                      |        |  |
|--|-----------------------|------|-------|-------|----------------------|--------|--|
|  | Leaves' N content     | 0.05 | 0.116 | 0.951 | Fail to reject $H_0$ | Normal |  |
|  | Leaves' K content     | 0.05 | 0.284 | 0.964 | Fail to reject $H_0$ | Normal |  |
|  | Fruits' TSS           | 0.05 | 0.188 | 0.958 | Fail to reject $H_0$ | Normal |  |
|  | Ascorbic acid content | 0.05 | 0.152 | 0.955 | Fail to reject $H_0$ | Normal |  |

|           |                           |      |       |       |                      |        |  |
|-----------|---------------------------|------|-------|-------|----------------------|--------|--|
| 2019/2020 | Plant Fresh Biomass       | 0.05 | 0.211 | 0.960 | Fail to reject $H_0$ | Normal |  |
|           | Plant Dry Biomass         | 0.05 | 0.250 | 0.962 | Fail to reject $H_0$ | Normal |  |
|           | Total leaf area per plant | 0.05 | 0.185 | 0.958 | Fail to reject $H_0$ | Normal |  |
|           | Fruit weight              | 0.05 | 0.123 | 0.952 | Fail to reject $H_0$ | Normal |  |

|  |                                |      |       |       |                               |        |  |
|--|--------------------------------|------|-------|-------|-------------------------------|--------|--|
|  | Total yield per m <sup>2</sup> | 0.05 | 0.210 | 0.960 | Fail to reject H <sub>0</sub> | Normal |  |
|  | Chlorophyll index              | 0.05 | 0.088 | 0.948 | Fail to reject H <sub>0</sub> | Normal |  |
|  | Leaves' N content              | 0.05 | 0.149 | 0.955 | Fail to reject H <sub>0</sub> | Normal |  |
|  | Leaves' K content              | 0.05 | 0.152 | 0.955 | Fail to reject H <sub>0</sub> | Normal |  |

|  |                       |      |       |       |                      |        |  |
|--|-----------------------|------|-------|-------|----------------------|--------|--|
|  | Fruits' TSS           | 0.05 | 0.247 | 0.962 | Fail to reject $H_0$ | Normal |  |
|  | Ascorbic acid content | 0.05 | 0.072 | 0.945 | Fail to reject $H_0$ | Normal |  |
